# Supplementary material for: SREBP-1 upregulates lipophagy to maintain cholesterol homeostasis in brain tumor cells
Source: PubMed Central journal article supplement — Cell Rep. Author manuscript; Available in PMC 2023 Sep 27. (PMC10528745; doi:10.1016/j.celrep.2023.112790), 2023-07-11
Supplement: NIHMS1920511-supplement-1.pdf [file NIHMS1920511-supplement-1.pdf]

**Cell Reports, Volume 42**

**Supplemental information**

**SREBP-1 upregulates lipophagy to maintain  
cholesterol homeostasis in brain tumor cells**

**Feng Geng, Yaogang Zhong, Huali Su, Etienne Lefai, Shino Magaki, Timothy F. Cloughesy, William H. Yong, Arnab Chakravarti, and Deliang Guo**

**Fig. S1**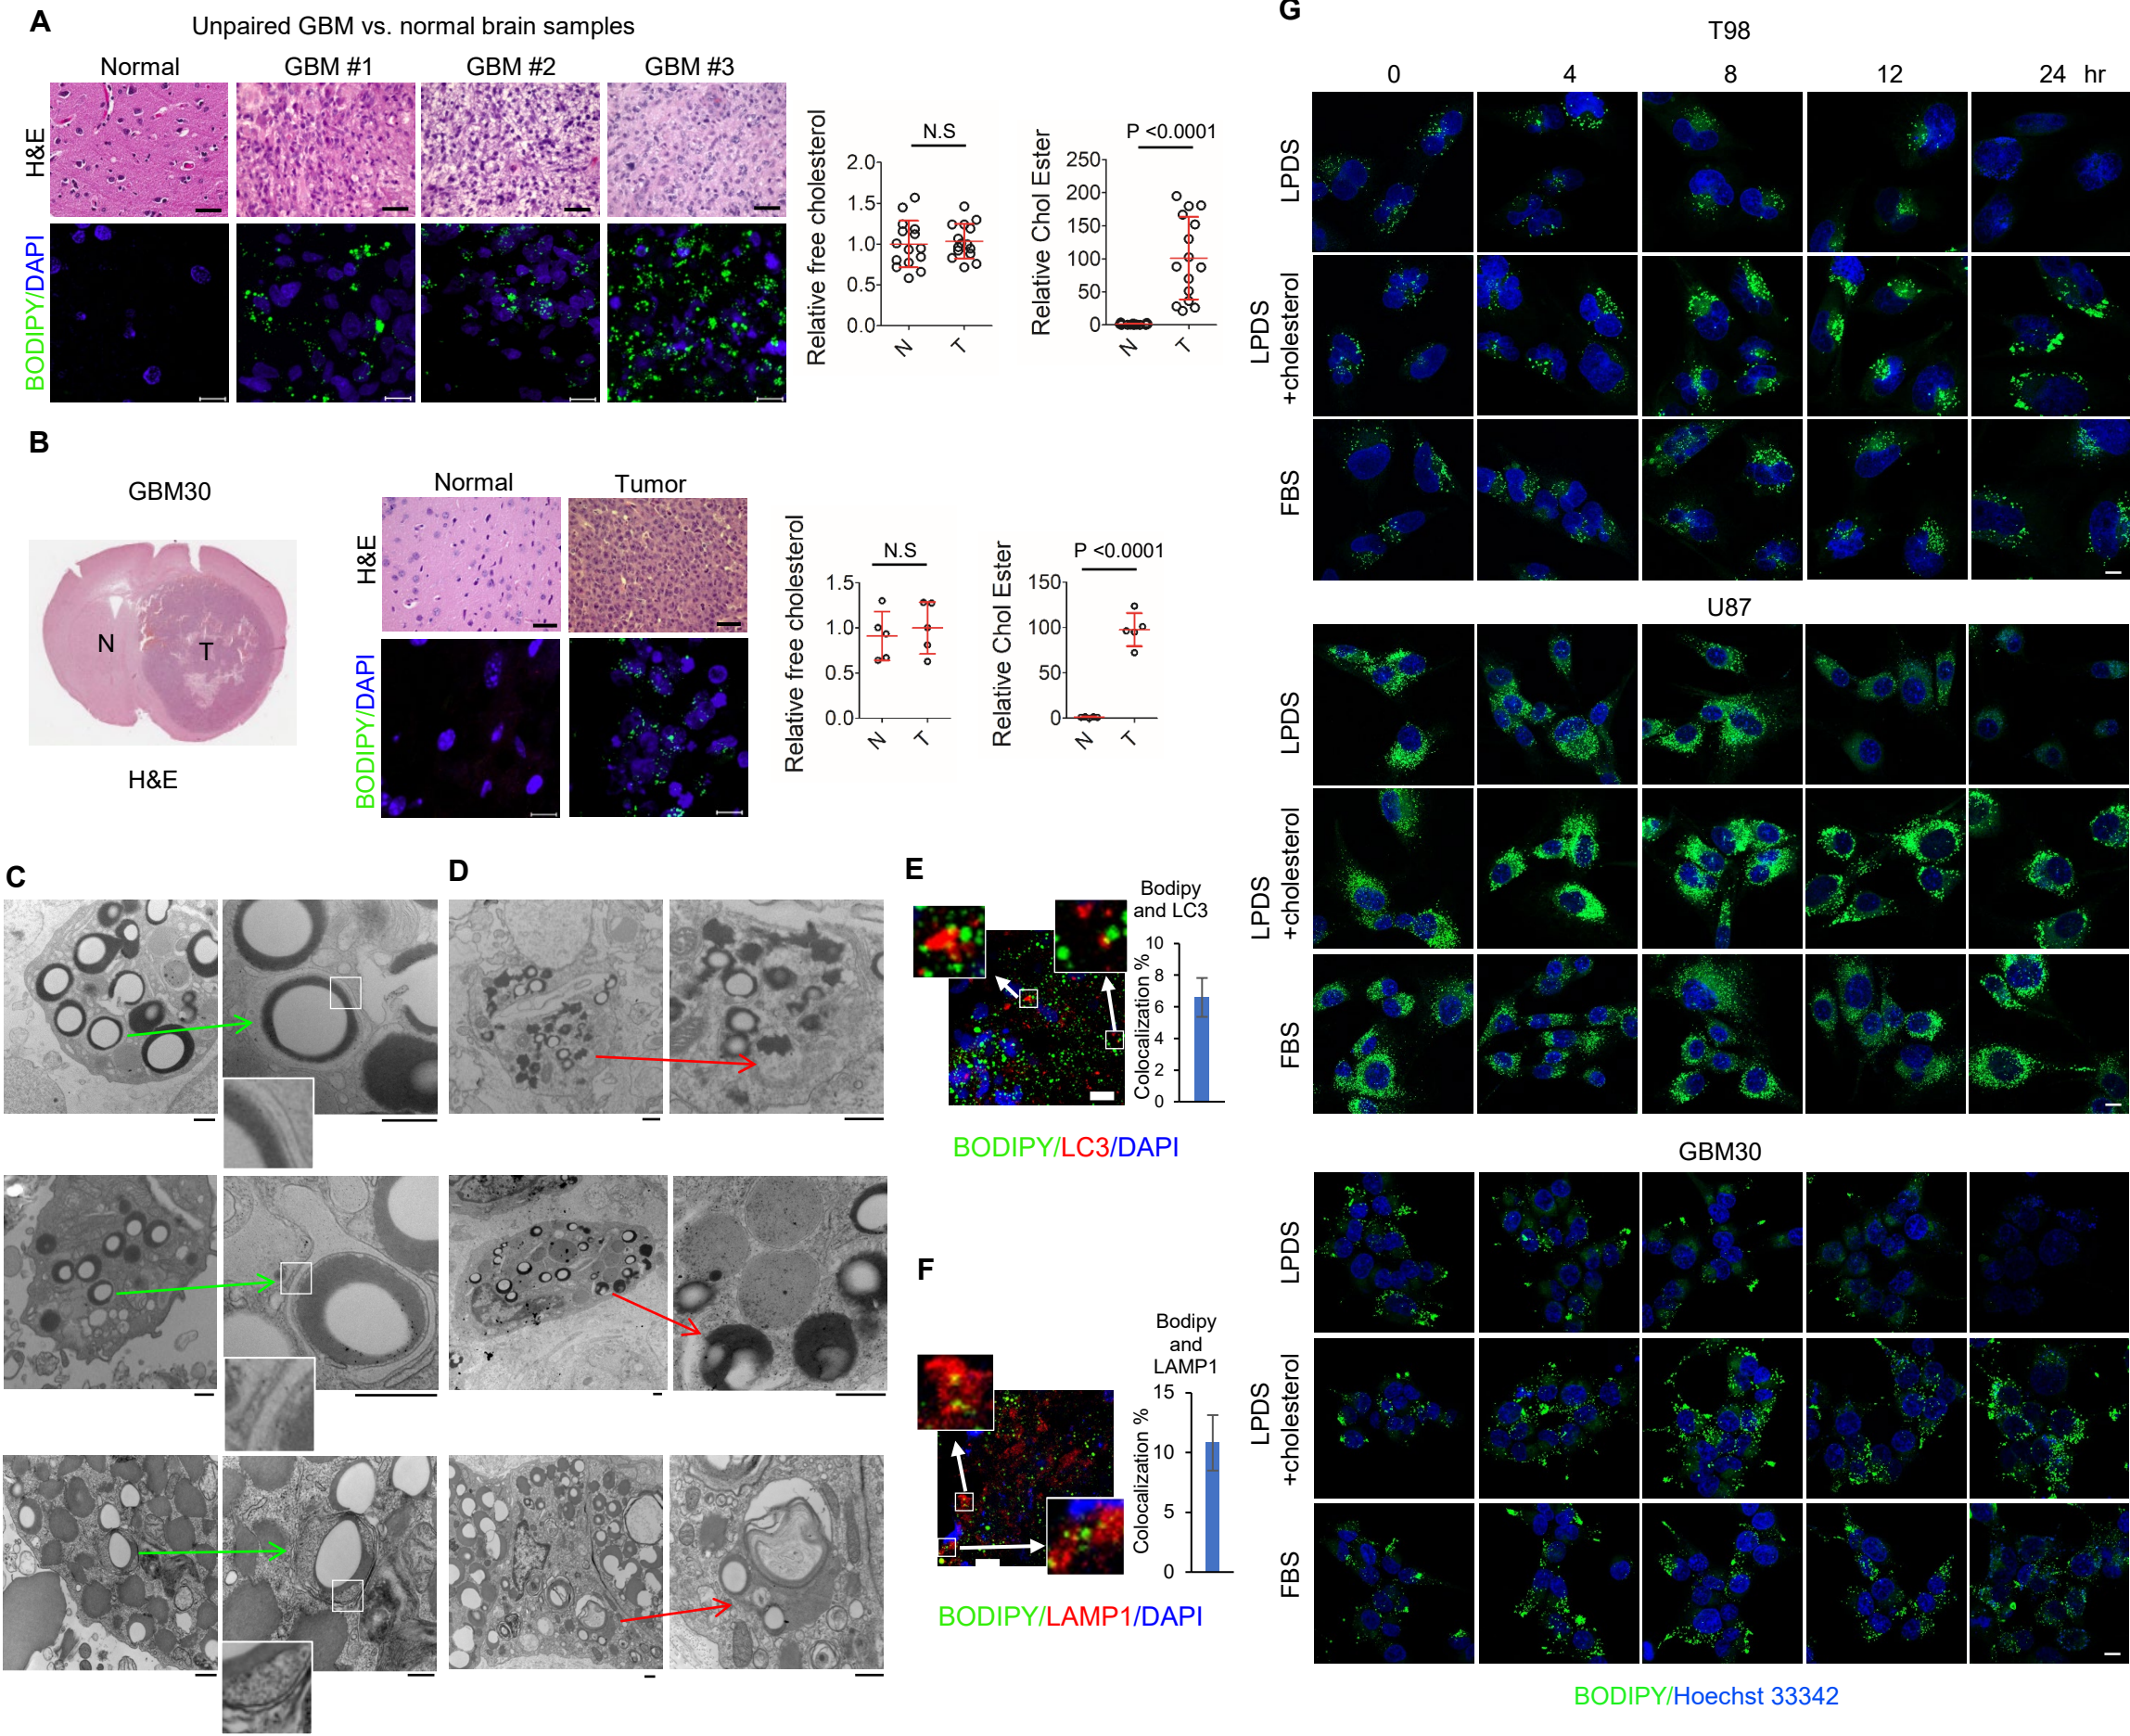

**Figure S1 (related to Figure 1). GBM cells contain abundant LD-bound CEs that are present in autophagosomes and lysosomes in tumor tissues.**

**A)** Representative images of H&E or BODIPY 493/503 (green)/DAPI (blue) staining of GBM tumor and normal brain tissues from unpaired human patient autopsies. Free cholesterol and cholesteryl esters (CE) in GBM tumor tissues versus normal brain tissues ( $n = 15$ ) were determined by cholesterol/CE measuring kit (mean  $\pm$  SD). Statistical significance was analyzed by an unpaired Student's *t* test. N.S, not significant. Scale bars, 10  $\mu\text{m}$  in fluorescence images and 50  $\mu\text{m}$  in H&E images.

**B)** Primary GBM30 orthotopic mouse model stained by H&E or BODIPY 493/503 (green)/DAPI (blue). Free cholesterol and CE in normal mice brain versus tumor tissues were determined by cholesterol/CE measuring kit (mean  $\pm$  SD,  $n = 5$ ). Statistical significance was analyzed by an unpaired Student's *t*-test. N.S, not significant. Scale bars, 10  $\mu\text{m}$  in fluorescence images and 50  $\mu\text{m}$  in H&E images.

**C, D)** Representative transmission electron microscopy images of tumor tissues from GBM patient biopsies. Green arrow indicates the double membrane vesicle that engulfs lipid droplets (LDs) (C); red arrow shows that LD is entrapped in the lysosome (LY) (D). Scale bars, 500 nm.

**E, F)** Representative confocal fluorescent images (left panels) of co-staining of BODIPY 493/503 (green) with LC3 (red) (E), or with LAMP1 (red) (F) of GBM patient biopsies; the colocalization (right panels) of BODIPY-stained LDs with LC3-stained puncta (E), or LAMP1-stained lysosomes (F) was quantified by ImageJ software from 10 areas (mean  $\pm$  SD). Scale bar, 10  $\mu\text{m}$ .

**G)** Representative confocal images of BODIPY 493/503 (green) staining in live T98, U87 and GBM30 cells cultured in 5%FBS or 5% LPDS media in the absence or presence of supplemental

cholesterol (5  $\mu\text{g/ml}$ ) for indicated time. Nuclei were stained with Hoechst 33342 (blue). Scale bar, 10  $\mu\text{m}$ .



**Fig. S2**

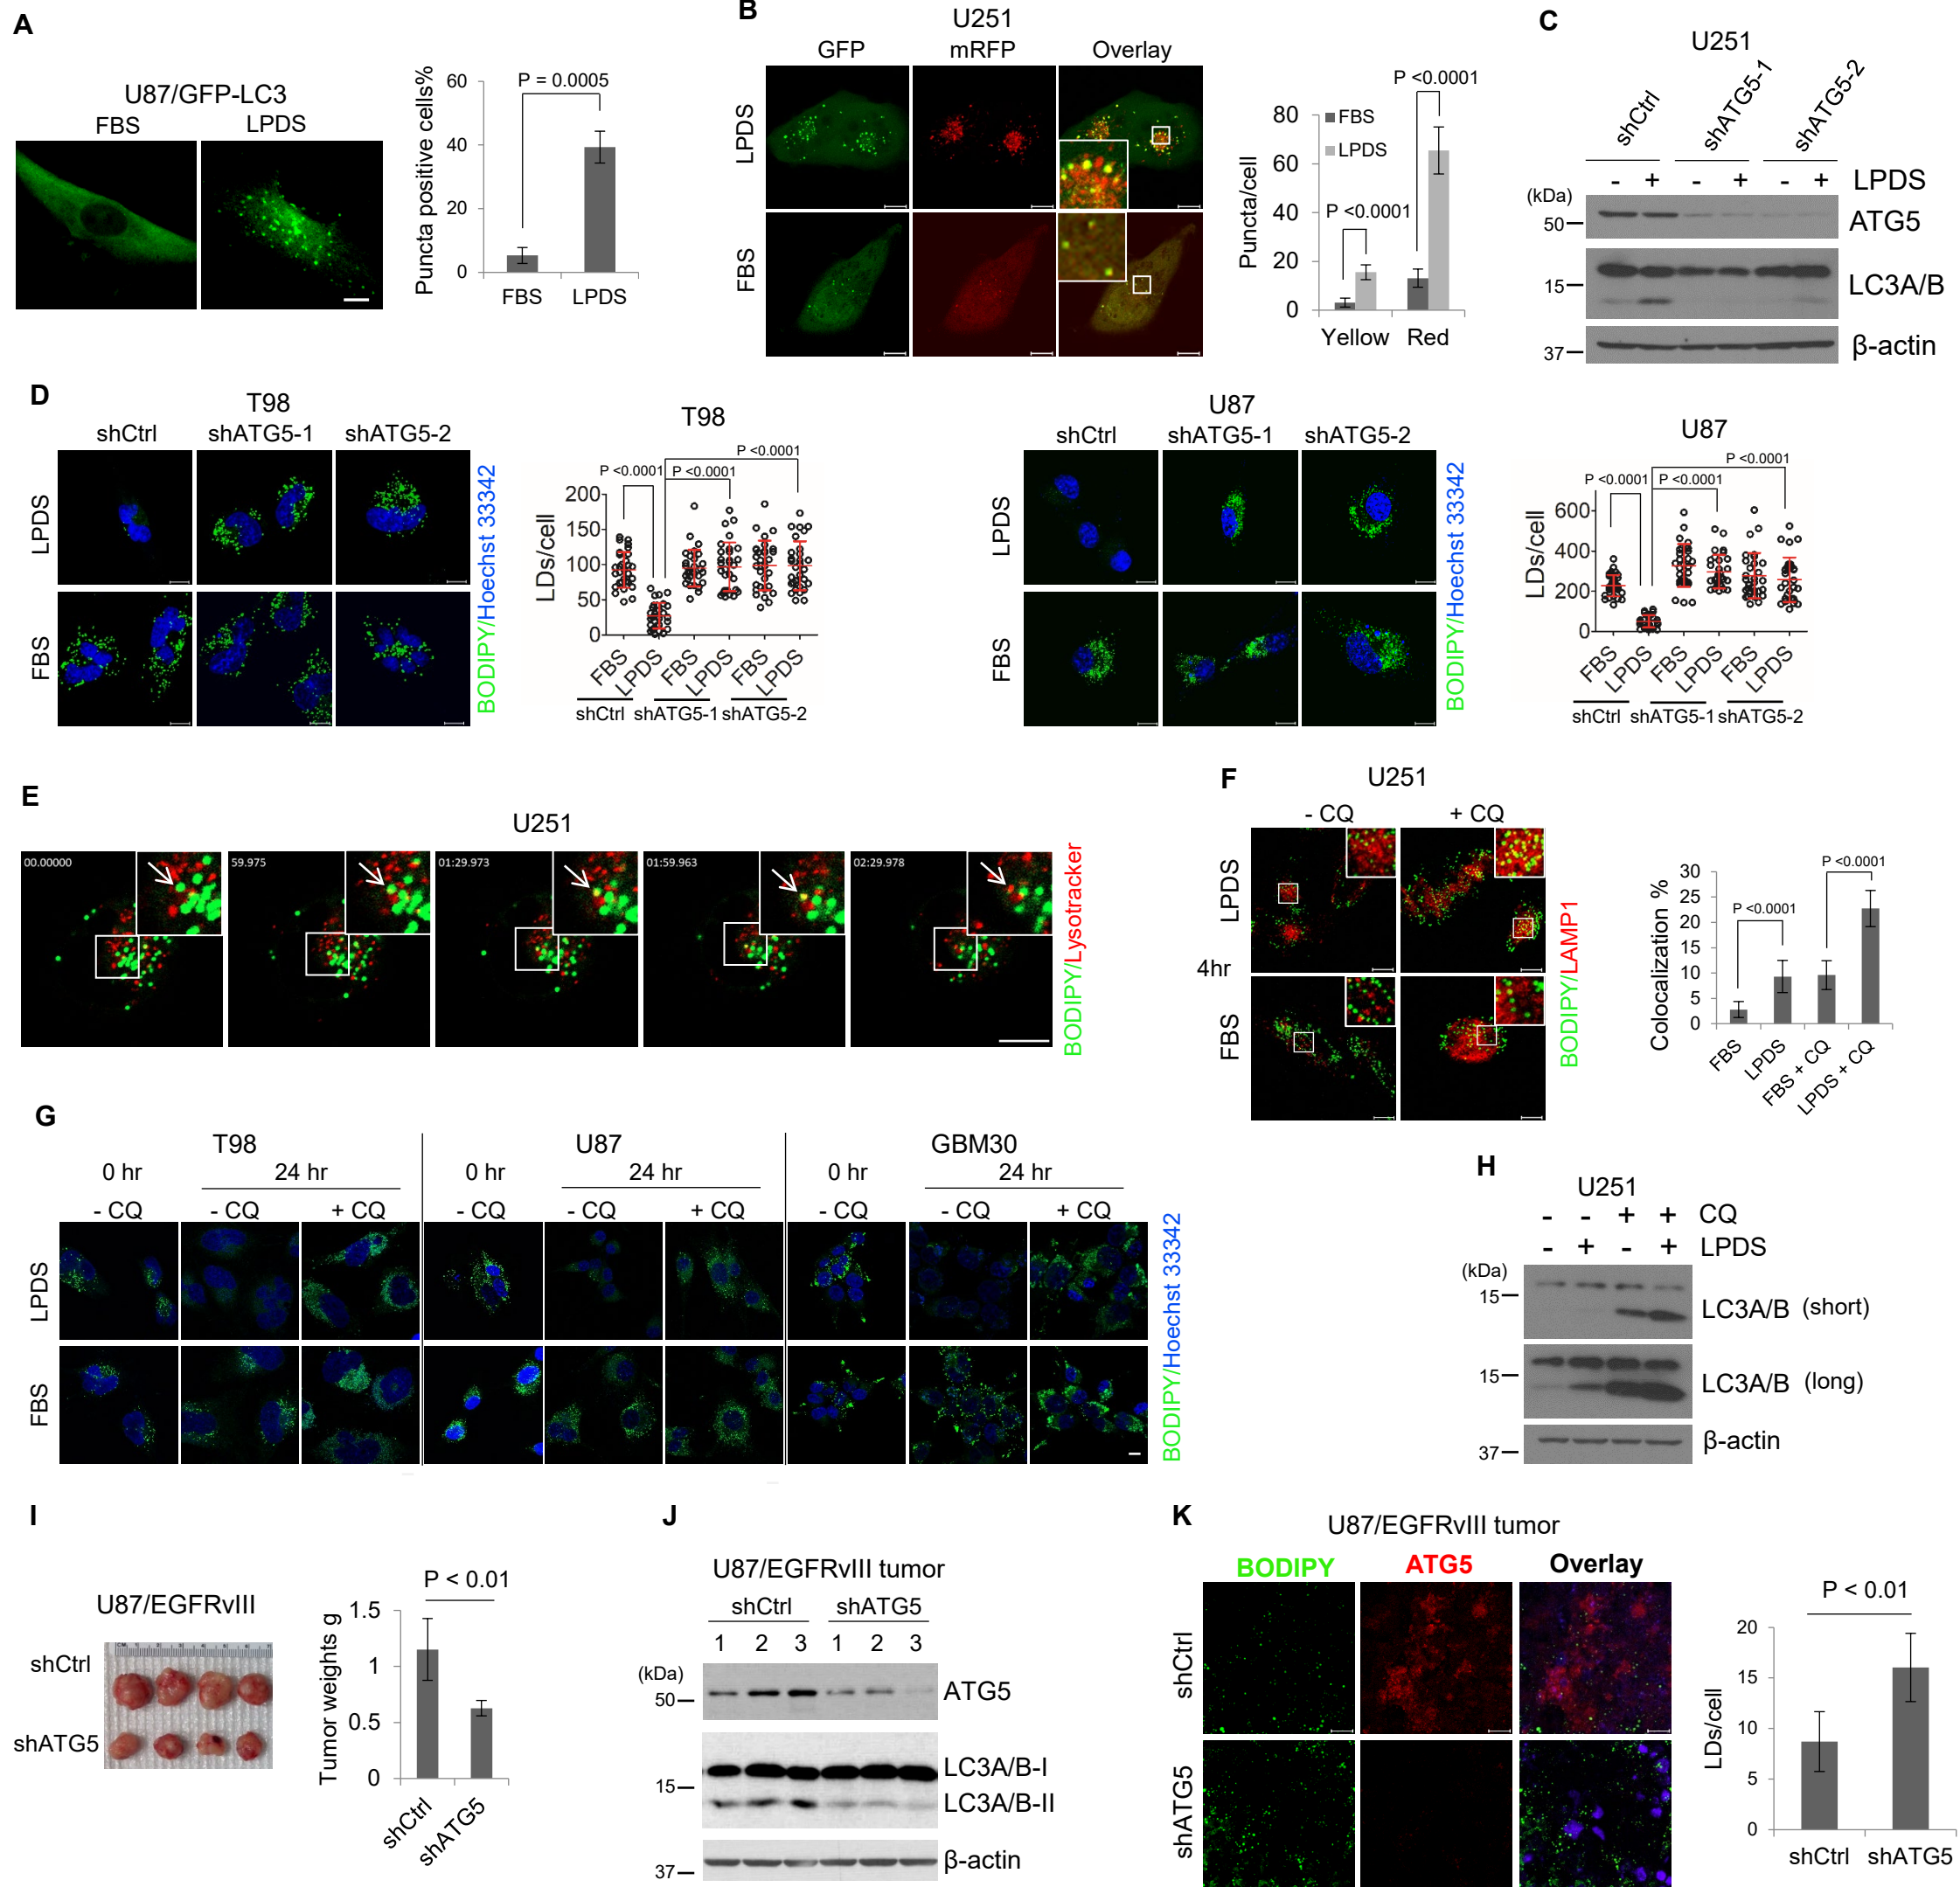

**Figure S2 (related to Figure 1). Extracellular cholesterol depletion induces autophagy-mediated hydrolysis of LDs in GBM cells.**

**A)** Representative confocal images of GFP-LC3 puncta in U87/GFP-LC3 cells cultured in 5% FBS or 5% LPDS for 24 hr (left panel). Puncta was quantified by ImageJ software, and cells containing over 30 puncta were counted as positive cells (mean  $\pm$  SD, right panel). Statistical significance was analyzed by an unpaired Student's t test. Scale bar, 10  $\mu$ m.

**B)** Representative confocal images of mRFP-GFP-LC3 expression in U251 cells cultured in 5% FBS or 5% LPDS media for 24 hr (left panels). The number of mRFP-GFP (yellow) and mRFP (red) signal in each condition was quantified by ImageJ software from over 30 cells (mean  $\pm$  SD) (right panels). Scale bars, 10  $\mu$ m. Statistical significance was analyzed by one-way ANOVA.

**C)** A representative western blot of U251 cells with shRNA silencing of ATG5 in comparison with shRNA control cultured in 5% FBS or 5% LPDS for 24 hr.

**D)** Representative confocal images of BODIPY 493/503 (green) staining in live T98 and U87 cells with shRNA silencing of ATG5 in comparison with shRNA control cells cultured in 5% FBS or 5% LPDS for 24 hr. Nuclei were stained with Hoechst 33342 (blue). LDs were quantified by ImageJ software from 30 cells (mean  $\pm$  SD). Statistical significance was analyzed by one-way ANOVA. Scale bars, 10  $\mu$ m

**E)** Representative time-lapse images of co-staining of BODIPY 493/503 (green) and LysoTracker (red) in live U251 cells cultured in 5% LPDS after 4 hr. Scale bar, 10  $\mu$ m.

**F)** Representative confocal images of co-staining of BODIPY 493/503 (green) with LAMP1 (red) in U251 cells cultured in 5% FBS or 5% LPDS media in the absence or presence of CQ (5  $\mu$ M) for 4 hr. The colocalization (yellow) of BODIPY-stained LDs with LAMP1 was quantified by

ImageJ software from 30 cells (mean  $\pm$  SD). Statistical significance was analyzed by one-way ANOVA. Scale bars, 10  $\mu$ m.

**G)** Representative confocal images of BODIPY 493/503 (green) staining in live T98, U87 and GBM30 cells cultured in 5% LPDS media in the absence or presence of CQ (5  $\mu$ M) for 0 and 24 hr. Nuclei were stained with Hoechst 33342 (blue). Scale bars, 10  $\mu$ m.

**H)** A representative western blot of U251 cells cultured in 5% FBS or 5% LPDS in the absence or presence of CQ (5  $\mu$ M) for 24 hr.

**I-K)** Mouse subcutaneous tumors of U87/EGFRvIII cells with shRNA silencing of ATG5 in comparison with shRNA control. Implanted tumors were excised and weighed (I), a representative western blot shows expressions of ATG5 and LC3B proteins in shCtrl and shATG5 tumors (J). BODIPY 493/503 (green) and anti-ATG5 antibody were used to stain the sections of tumors tissues and nuclei were stained with DAPI (blue). LDs were quantified by ImageJ software (mean  $\pm$  SD). Statistical significance was analyzed by an unpaired Student's t test. Scale bars, 10  $\mu$ m.

**Fig. S3**

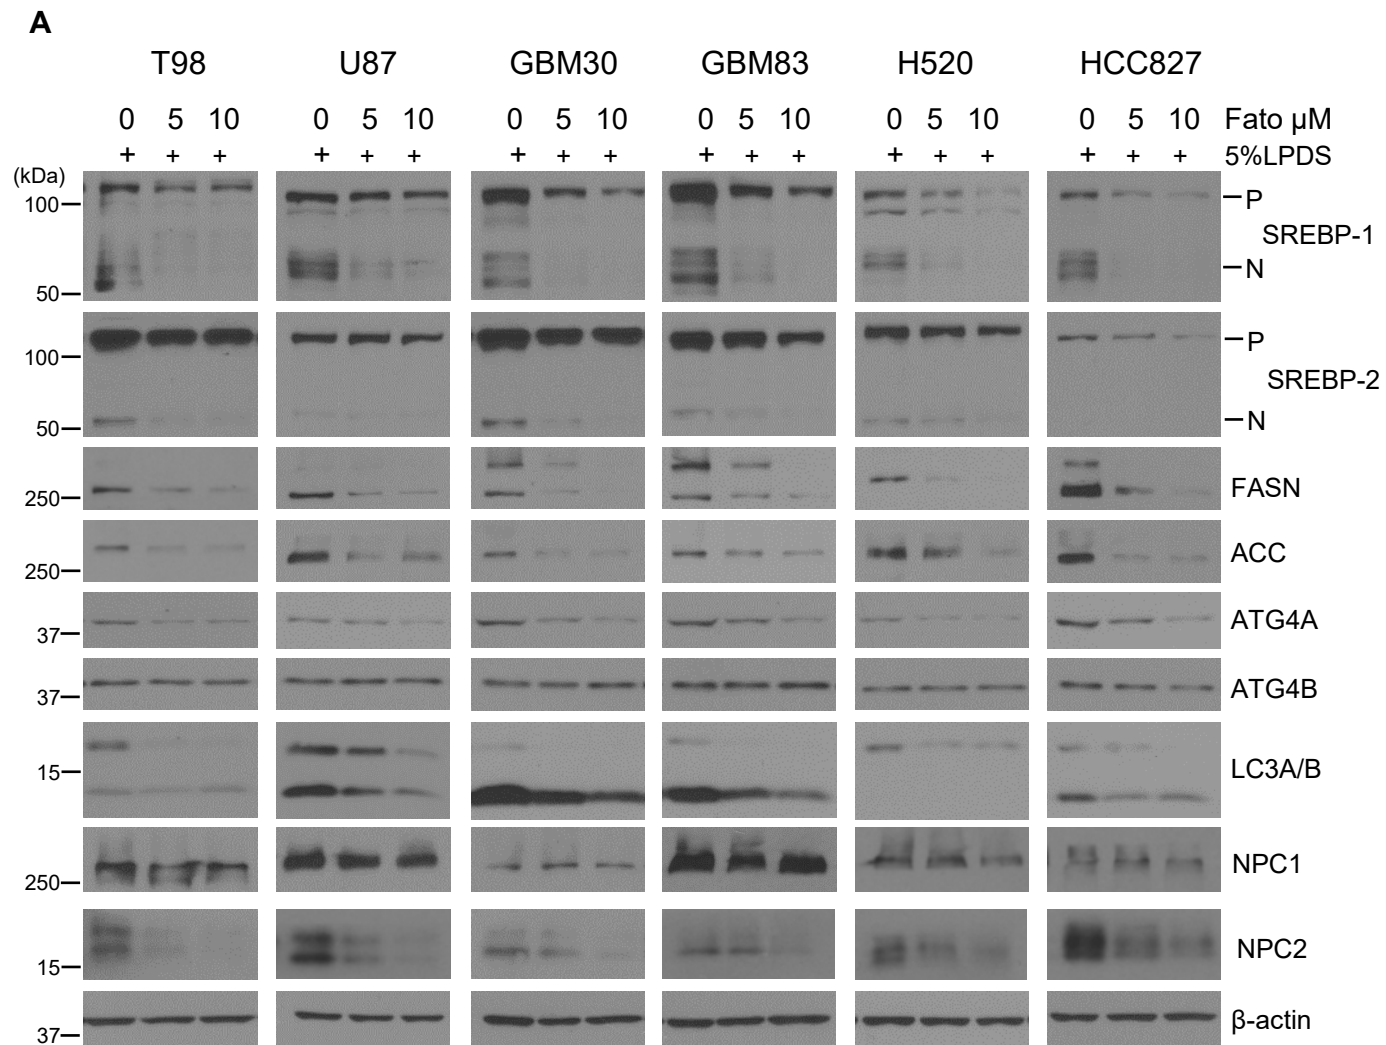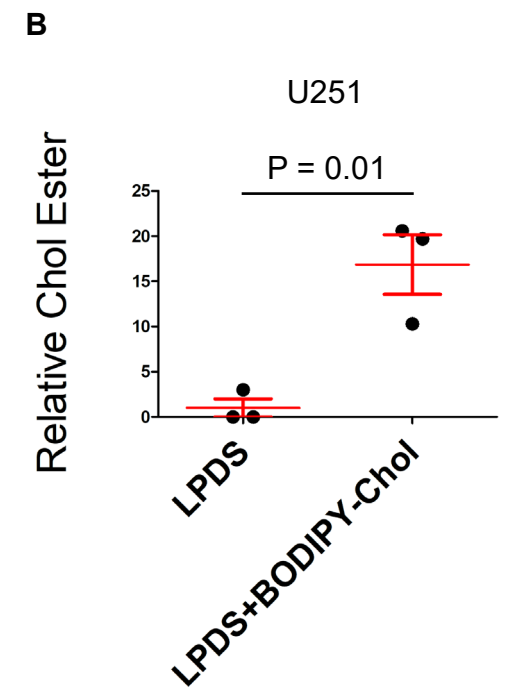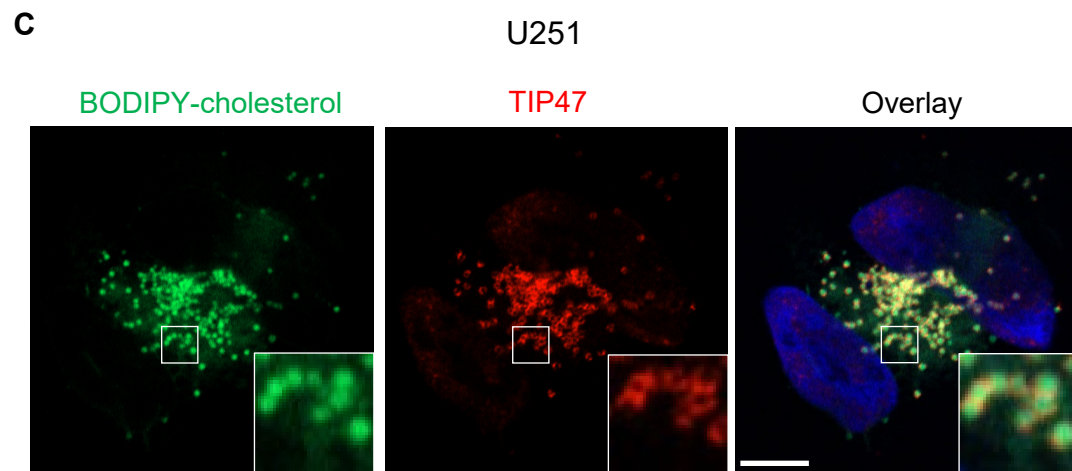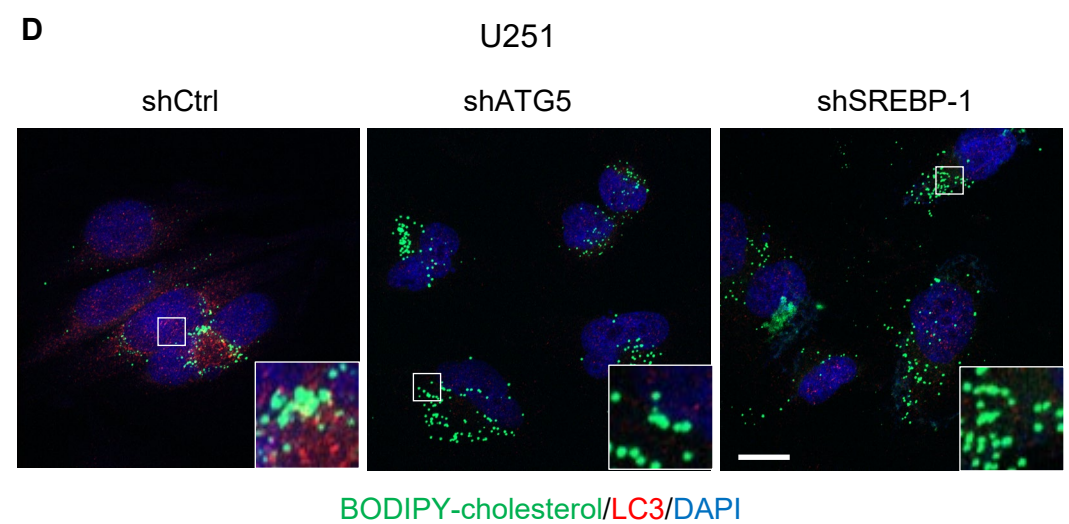



**Figure S3 (related to Figure 2). SREBP-1 inactivation is associated with reduced autophagic protein levels in GBM cells.**

**A)** Representative western blots of T98, U87, GBM30, GBM83 (GBM), H520 and HCC827 (lung cancer) cells cultured in 5%LPDS in the absence or presence of SREBP inhibitor Fatostatin at indicated doses for 40 hr.

**B)** Relative cholesteryl ester levels in U251 cells cultured in 5%LPDS or 5%LPDS supplemented with BODIPY-cholesterol (20  $\mu\text{g}/\text{ml}$ ) for 24 hr. Statistical significance was analyzed by an unpaired Student's t-test.

**C)** Representative confocal images of U251 cells cultured with BODIPY-cholesterol (20  $\mu\text{g}/\text{ml}$ ) for 24 hr in 5% FBS culture medium (green) and stained with TIP47 (red). Nuclei were stained with DAPI (blue). Scale bar, 10  $\mu\text{m}$ .

**D)** Representative confocal images of U251 cells with shRNA knockdown of ATG5 or SREBP-1 cultured with BODIPY-cholesterol (20  $\mu\text{g}/\text{ml}$ ) (green) in 5% FBS medium for 24 hr, then switched medium to 5% LPDS for 4 hr and stained with LC3 (red). Nuclei were stained with DAPI (blue). Scale bar, 10  $\mu\text{m}$ .

**Fig. S4**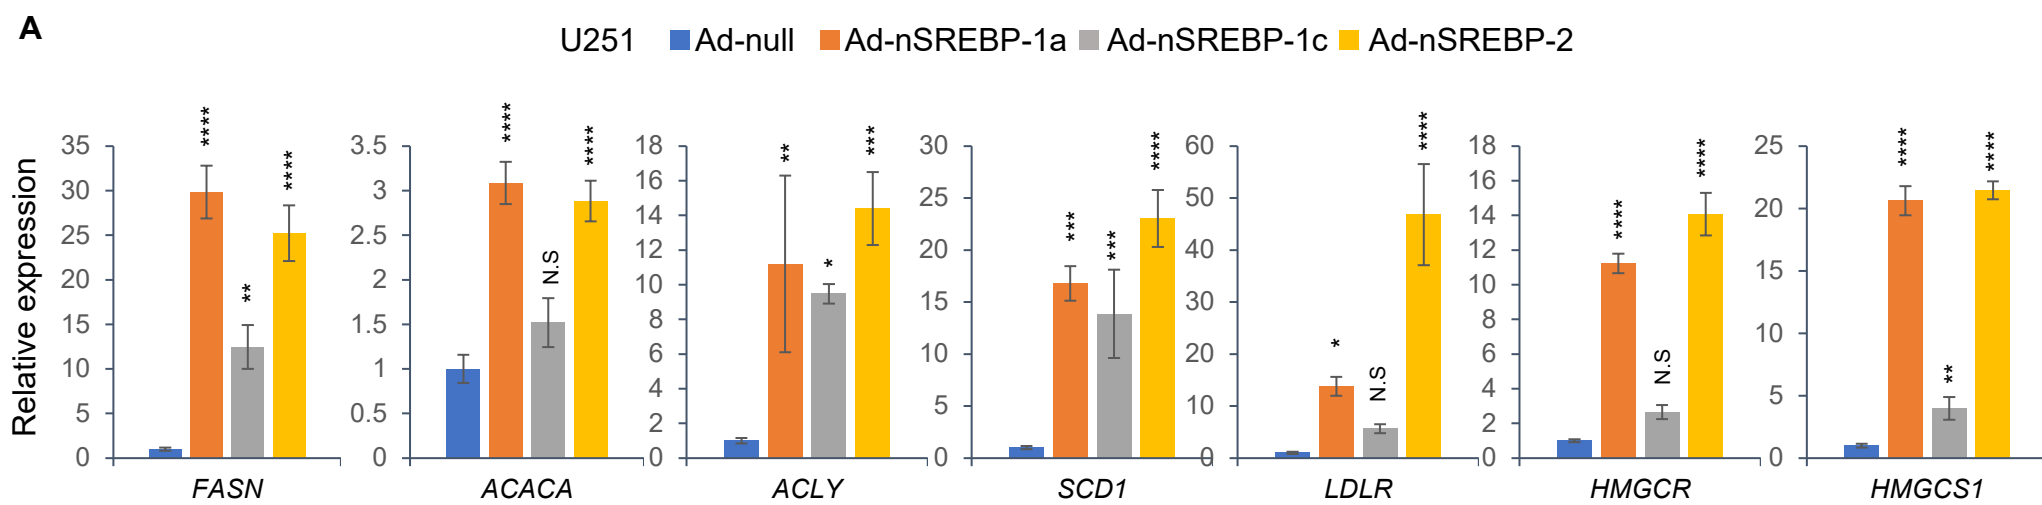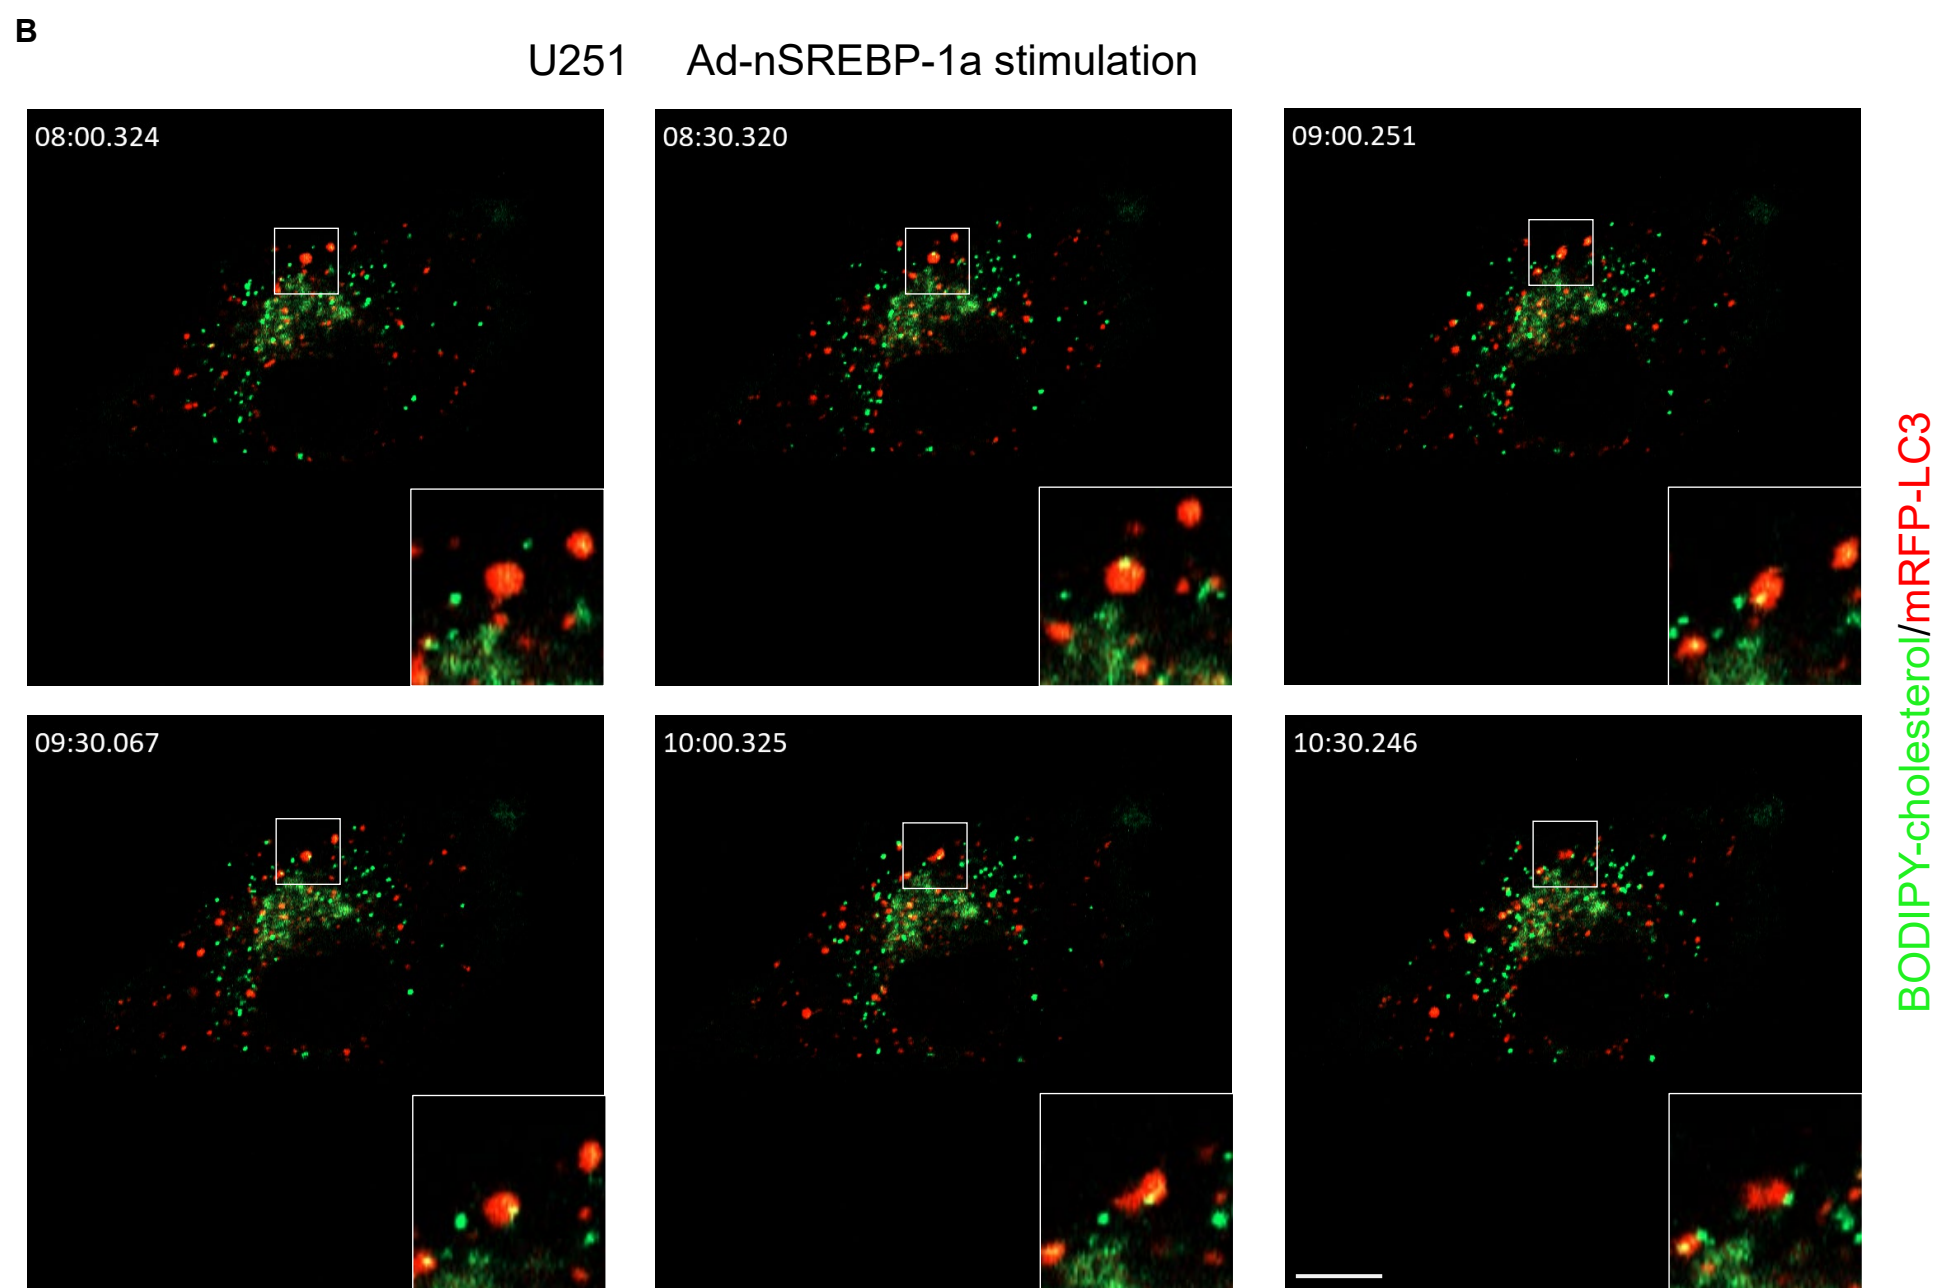

**Figure S4 (related to Figure 3). Overexpression of N-terminal SREBP isoforms results in greater lipogenic and LDLR expression in GBM cells.**

**A)** Real-time PCR analysis of mRNA expression (mean  $\pm$  SD) of lipogenic and LDLR genes in U251 cells with overexpression of N-terminal SREBP-1a (Ad-nSREBP-1a), -1c (Ad-nSREBP-1c), -2 (Ad-nSREBP-2) or Ad-null via adenovirus-mediated vector cultured in 5% FBS for 48 hr. Statistical significance was analyzed by one-way ANOVA. \*,  $p < 0.05$ . \*\*,  $p < 0.01$ . \*\*\*,  $p < 0.001$ . \*\*\*\*,  $p < 0.0001$ . N.S, not significant.

**B)** Representative time-lapse images (2.5 minutes from 8' to 10'30'') of BODIPY-cholesterol-formed LDs (green) (20  $\mu\text{g/ml}$  for 12 hr in 5% FBS medium) and RFP-LC3-formed puncta (red) in live U251-RFP-LC3 stable cells with overexpression of N-terminal SREBP-1a via adenovirus-mediated vector for 8 hours. Scale bar, 10  $\mu\text{m}$ .

**Fig. S5**

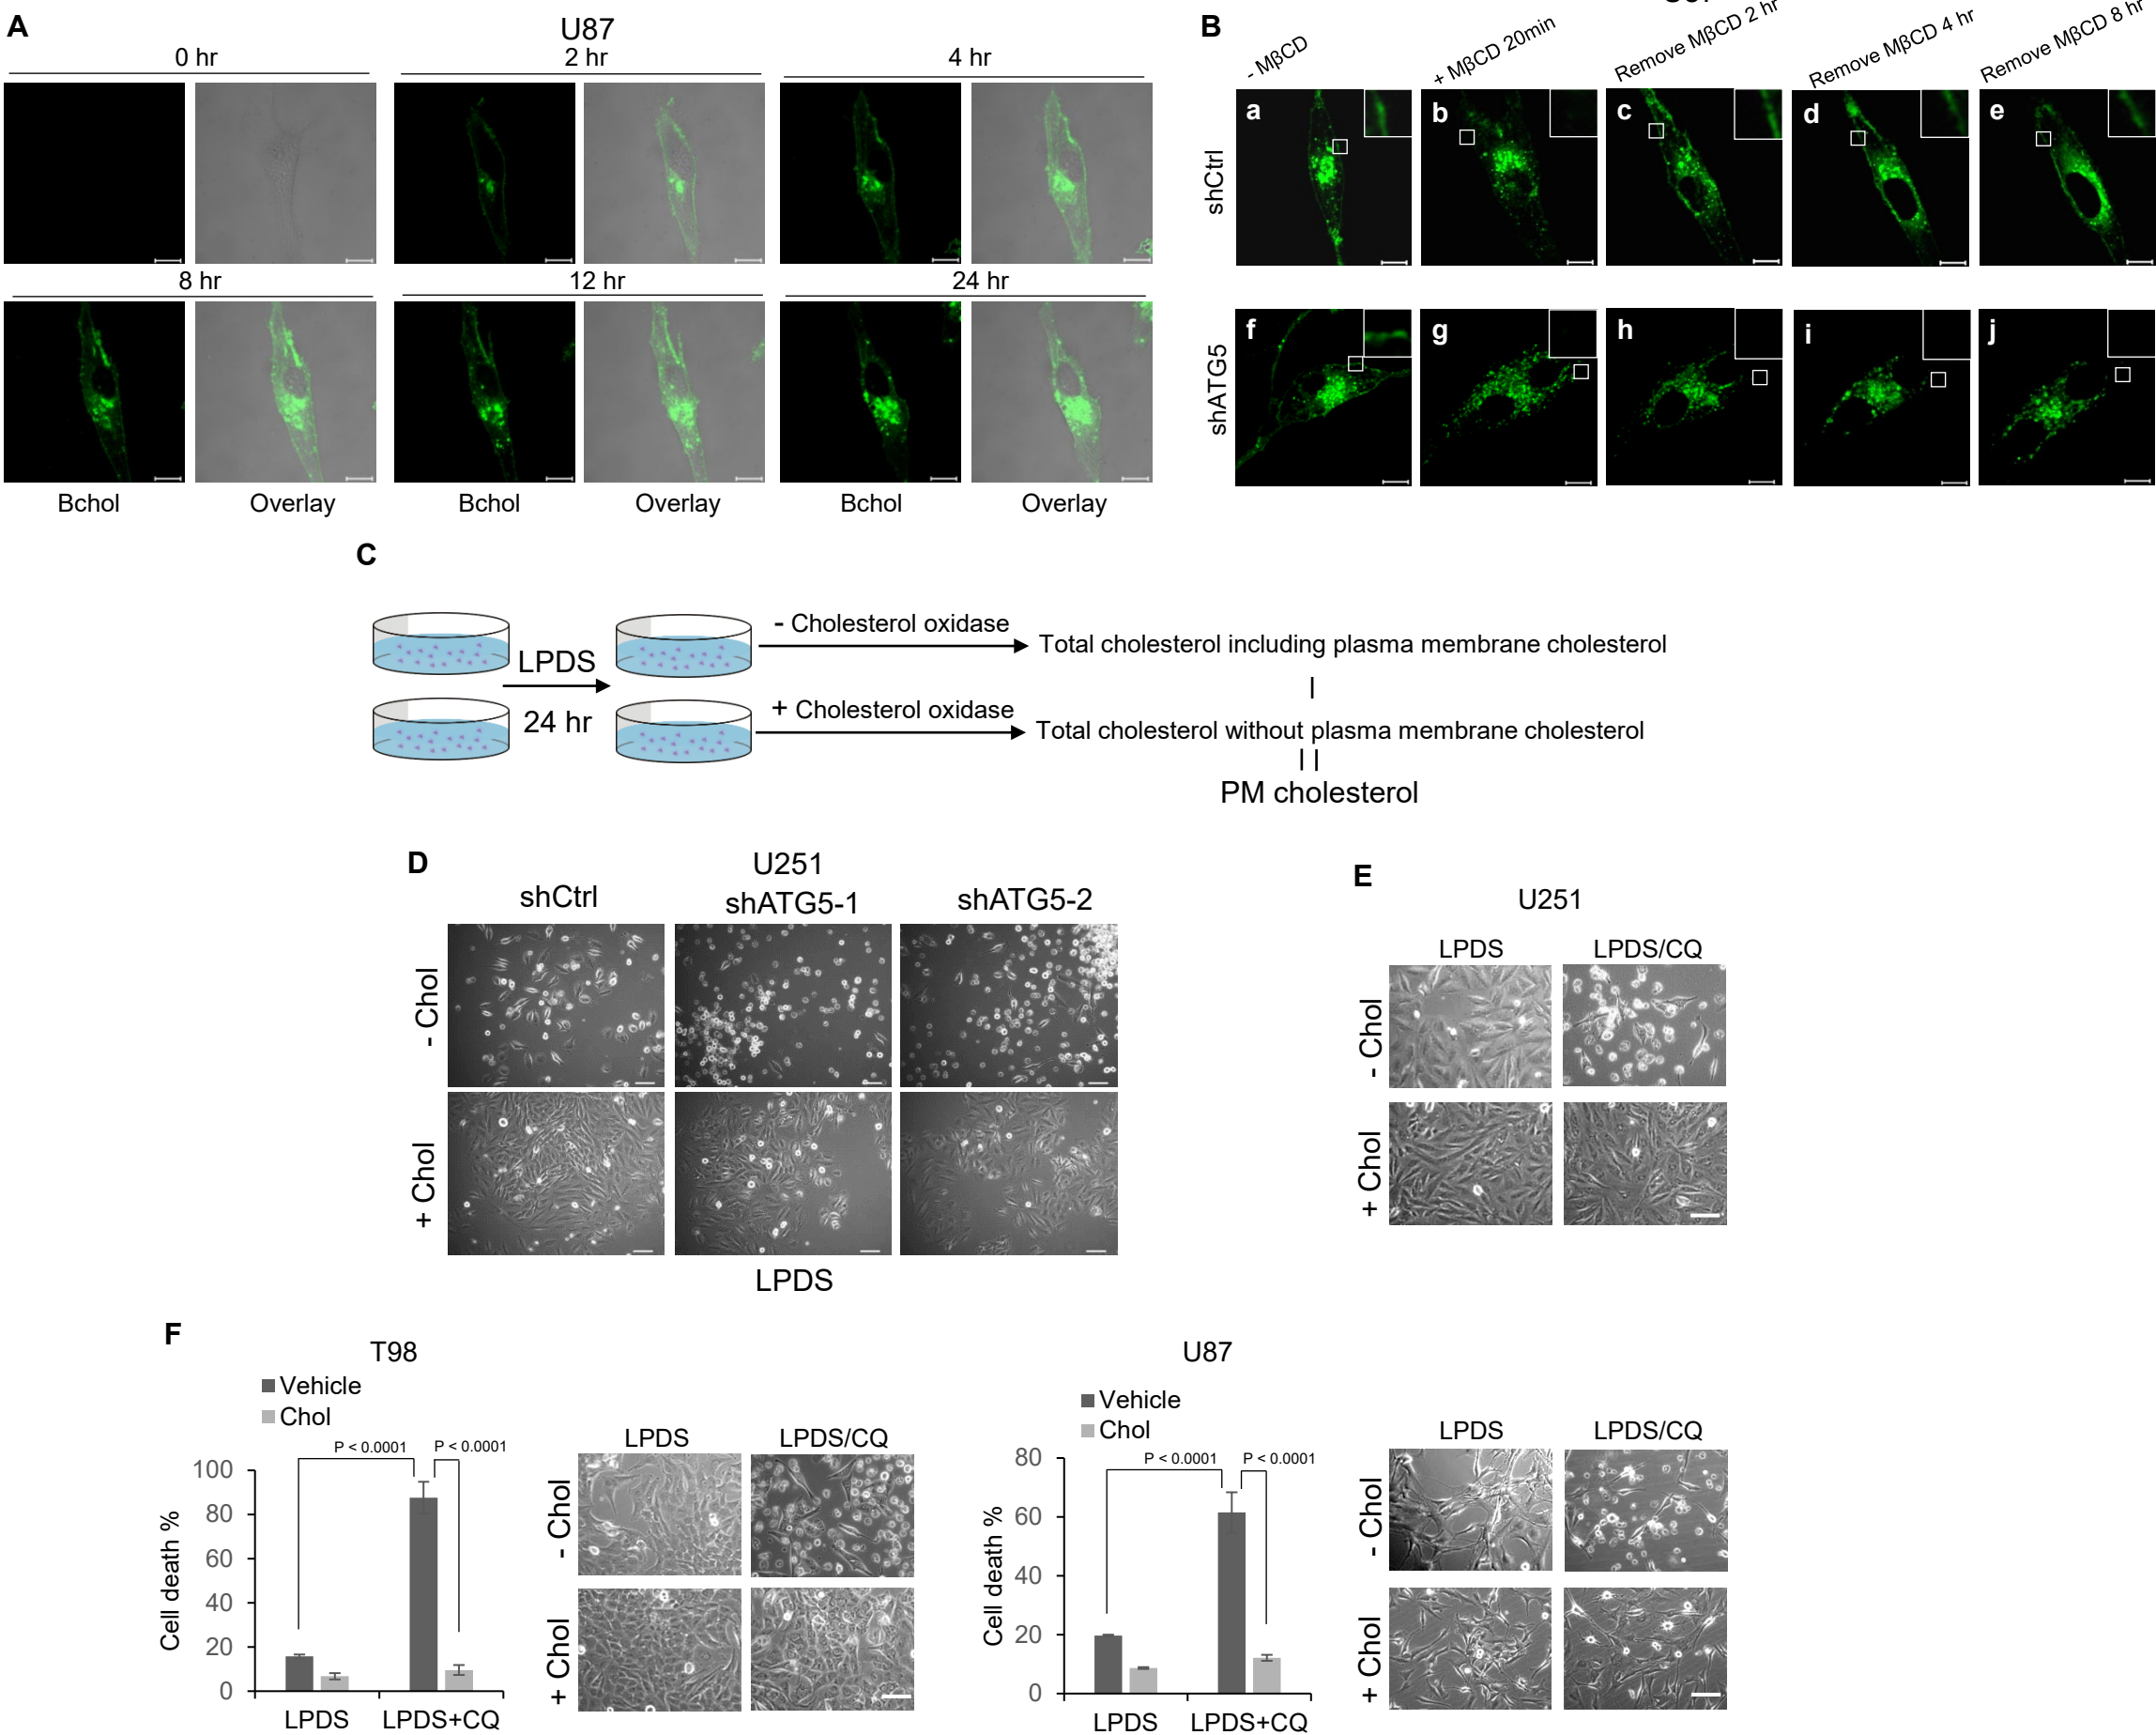



**Figure S5 (related to Figure 4). Lipophagy of LDs releases cholesterol to maintain membrane cholesterol homeostasis and GBM survival upon extracellular cholesterol depletion.**

**A)** Representative confocal images of U87 cells cultured in serum-free media with BODIPY-cholesterol (20  $\mu\text{g/ml}$ ) after serum starvation for 24 hr and imaged by confocal and light microscopy at the indicated time. Scale bars, 10  $\mu\text{m}$ .

**B)** U87 cells in which ATG5 was knocked down by a shRNA-expressing lentivirus versus cell treated with an shRNA control were cultured in serum-free media with BODIPY-cholesterol (20  $\mu\text{g/ml}$ ) for 24 hr after serum starvation for 24 hr (a and f), then treated with M $\beta$ CD (4  $\mu\text{M}$ ) for 20 min (b and g), followed by removal of M $\beta$ CD and observed by confocal microscopy at 2, 4 and 8 hr (c-e, h-J). Inserts are the amplification of membrane labeling by BODIPY-cholesterol. Scale bars, 10  $\mu\text{m}$ .

**C)** A schematic diagram illustrating the procedure of biochemical measurement of plasma membrane (PM) cholesterol level.

**D)** Representative bright field images of U251 cells with shRNA silencing of ATG5 in comparison with shRNA control cultured in 5% LPDS in the absence or presence of supplemental cholesterol (5  $\mu\text{g/ml}$ ) for 3 days. Scale bars, 100  $\mu\text{m}$ .

**E)** Representative brightfield images of U251, cells cultured in 5% LPDS in the absence or presence of CQ (5  $\mu\text{M}$ ) with/without supplemental cholesterol (5  $\mu\text{g/ml}$ ) for 3 days. Scale bar, 100  $\mu\text{m}$ .

**F)** Cell death percentile (left panel) and representative brightfield images (right panel) of T98 and U87 cells cultured in 5% LPDS in the absence or presence of CQ (5  $\mu\text{M}$ ) with/without supplemental cholesterol (5  $\mu\text{g/ml}$ ) for 3 days. Statistical significance was analyzed by one-way ANOVA. Scale bar, 100  $\mu\text{m}$ .

**Fig. S6**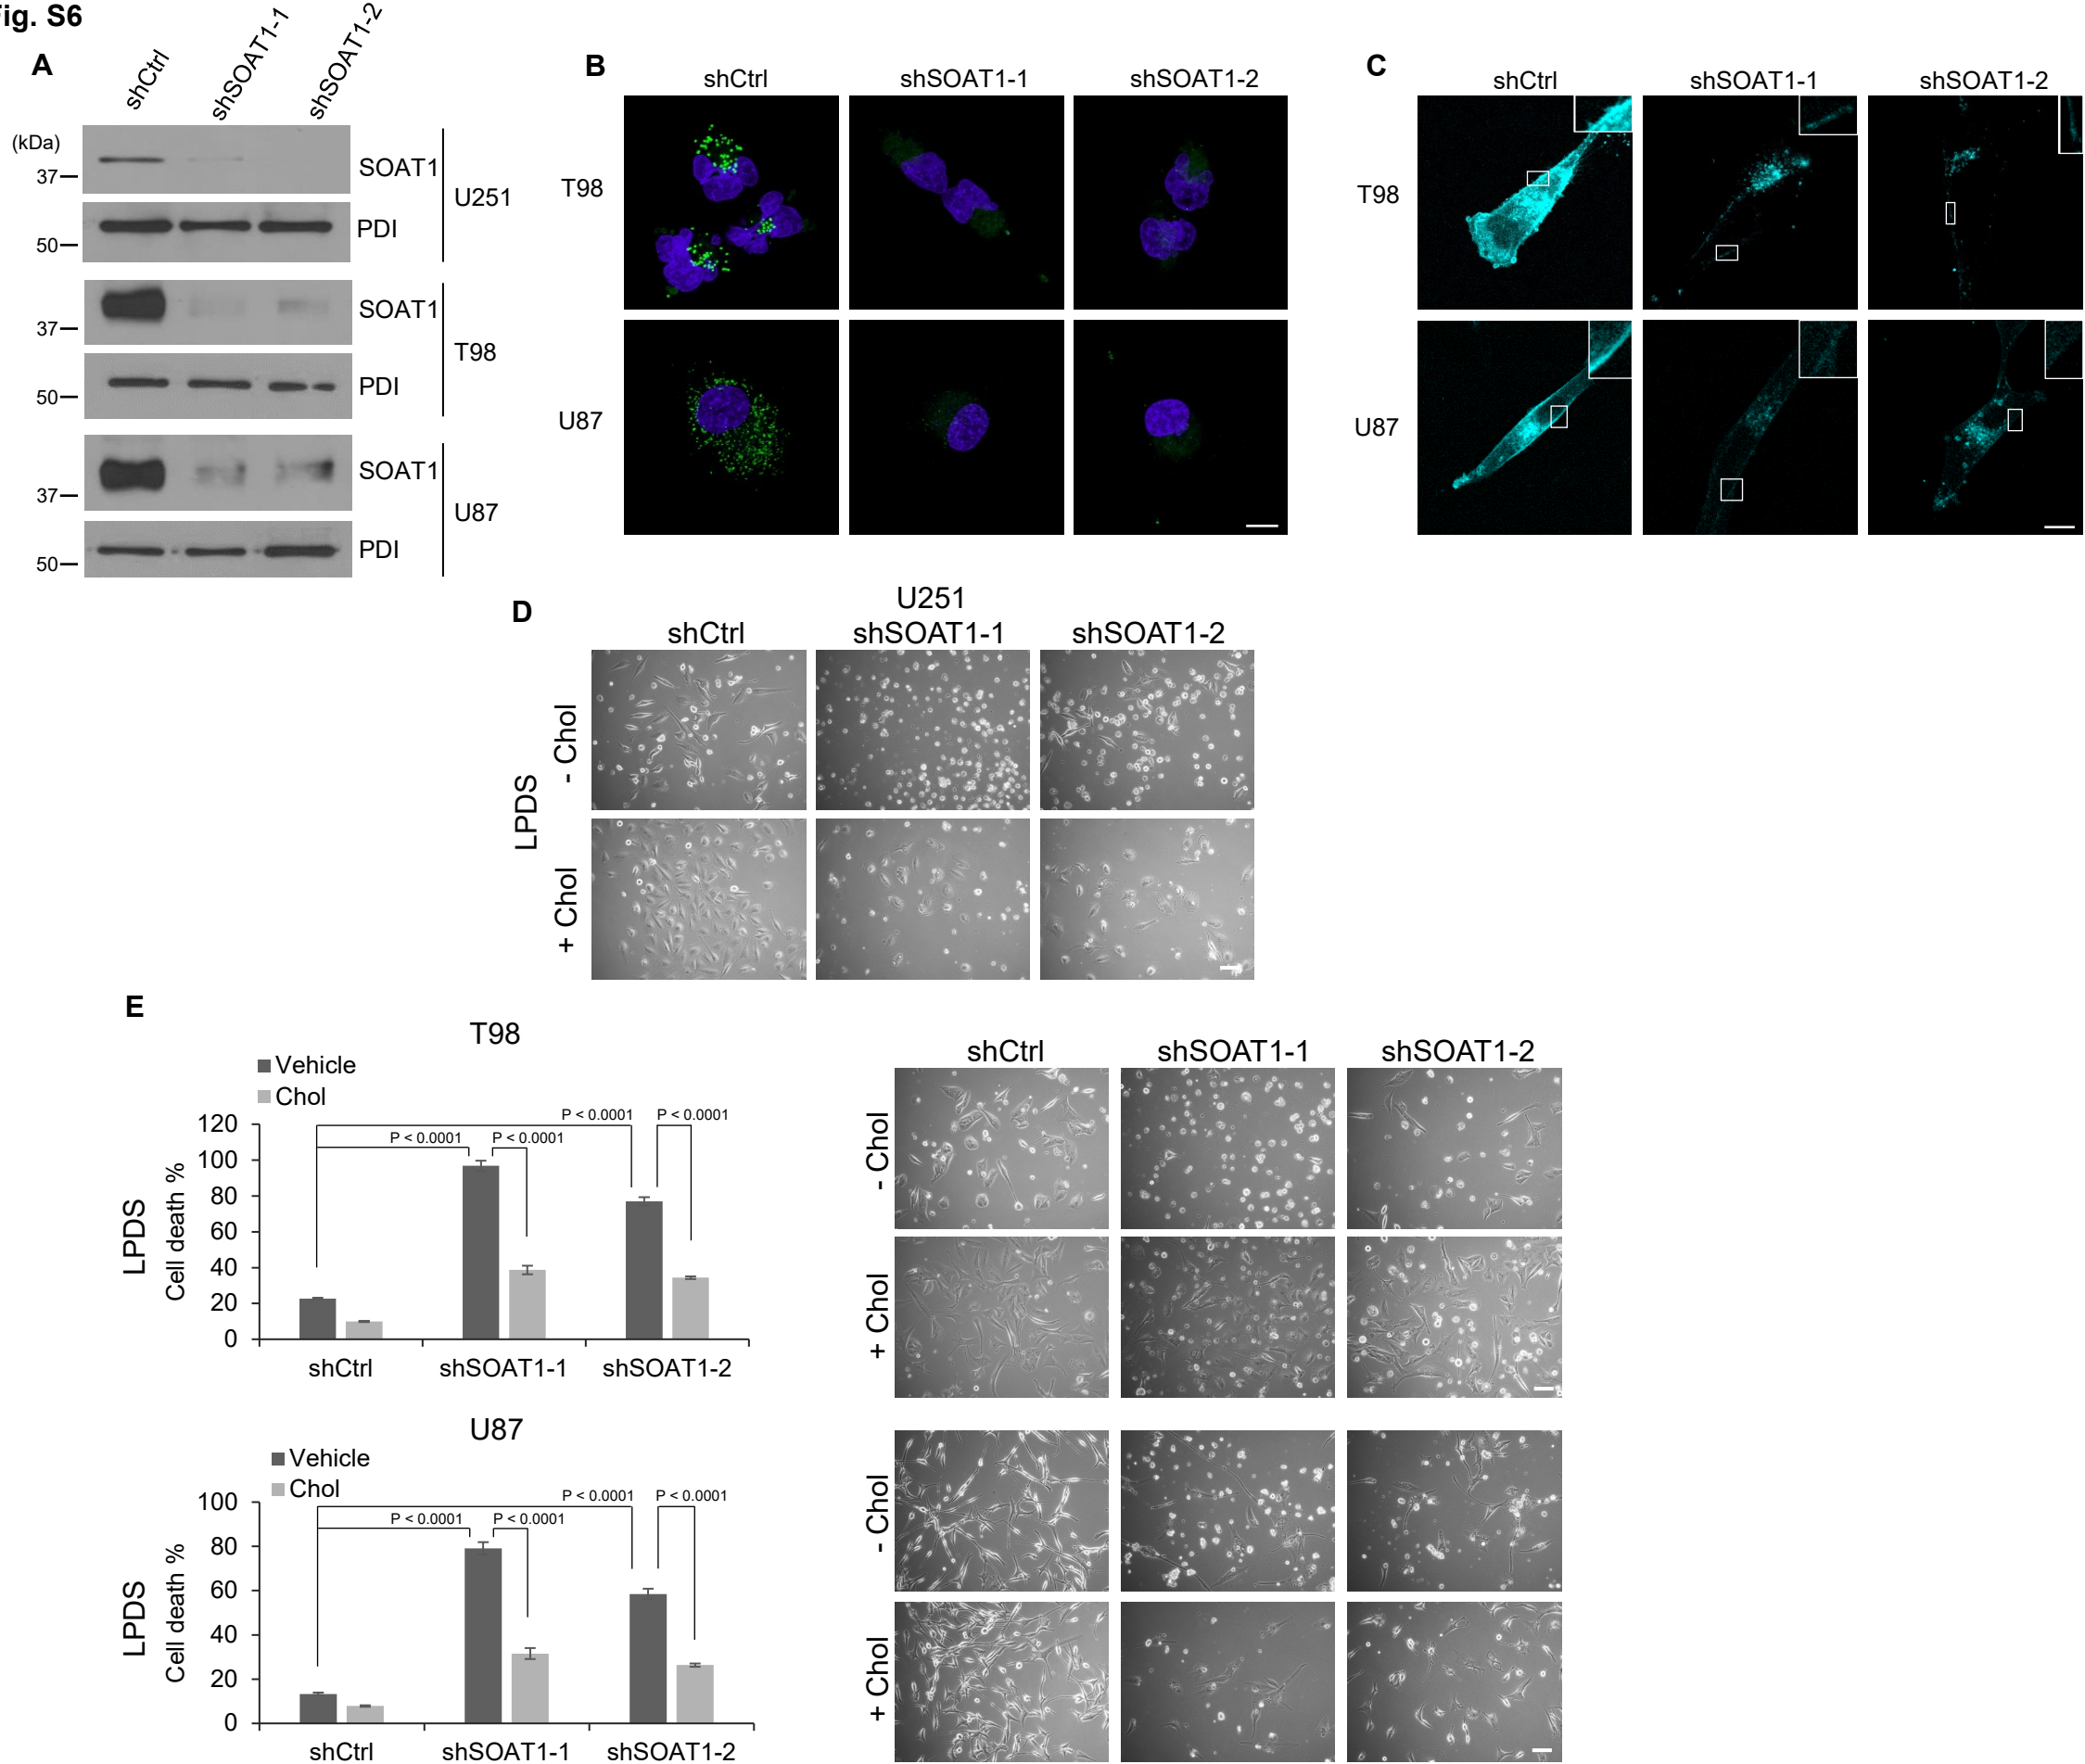

**Figure S6 (related to Figure 4). GBM cells depleted of LD-bound CE storage fail to maintain proper membrane cholesterol levels and are sensitive to exogenous cholesterol depletion**

**A)** Representative western blots of expression of SOAT1 in U251, T98 and U87 cells with shRNA silencing of SOAT1 in comparison with shRNA control cells.

**B)** Representative confocal images of BODIPY 493/503 (green) staining in live T98 and U87 cells with shRNA silencing of SOAT1 in comparison with shRNA control cultured in 5% FBS media for 24 hr and then split in 35 mm glass-bottom dish cultured in 5% FBS media for 24 hr. Nuclei were stained with Hoechst 33342 (blue). Scale bar, 10  $\mu\text{m}$ .

**C)** Filipin staining and fluorescent microscopy images of T98 and U87 with shRNA silencing of SOAT1 in comparison with shRNA control cells cultured in 5% LPDS for 24 hr. Scale bar, 10  $\mu\text{m}$ .

**D)** Representative bright field images of U251, cells with shRNA silencing of SOAT1 in comparison with shRNA control cultured in 5% LPDS in the absence or presence of supplemental cholesterol (5  $\mu\text{g}/\text{ml}$ ) for 3 days. Scale bars, 100  $\mu\text{m}$ .

**E)** Cell death percentile (left panel) and representative bright field images (right panel) of T98 and U87 cells with shRNA silencing of SOAT1 in comparison with shRNA control cultured in 5% LPDS in the absence or presence of supplemental cholesterol (5  $\mu\text{g}/\text{ml}$ ) for 3 days. Statistical significance was analyzed by one-way ANOVA. Scale bars, 100  $\mu\text{m}$ .
